# Supplementary material for: Performances and mechanistic investigations of a triphosphine trioxide/ionic liquid system for rare earth extraction
Source: Royal Society of Chemistry journal article supplement (doi:10.1039/c5dt03072b), 2015-12-03
Supplement: c5dt03072b1.pdf [file c5dt03072b1.pdf]

## Supplementary Information

### Performances and mechanistic investigations of triphosphine trioxide / ionic liquid system for rare earth extraction

R. Turgis,<sup>a</sup> G. Arrachart,<sup>a\*</sup> V. Dubois,<sup>a</sup> S. Dourdain,<sup>a</sup> D. Virieux,<sup>b</sup> S. Michel,<sup>c</sup> S. Legeai,<sup>c</sup> M. Lejeune,<sup>d</sup> M. Draye,<sup>d</sup> S. Pellet-Rostaing<sup>a\*</sup>

---

<sup>a</sup> Institut de Chimie Séparative de Marcoule, UMR 5257, CEA-CNRS-UM-ENSCM, Laboratoire de Tri ionique par les Systèmes Moléculaires auto-assemblés, Site de Marcoule, BP17171, 30207 Bagnols sur Cèze, France.

Email : [guilhem.arrachart@cea.fr](mailto:guilhem.arrachart@cea.fr); [stephane.pellet-rostaing@cea.fr](mailto:stephane.pellet-rostaing@cea.fr)

<sup>b</sup> Institut Charles Gerhardt - UMR 5253 – équipe AM2N, ENSCM, 8 rue de l'Ecole Normale, 34 296 Montpellier Cedex 5, France.

<sup>c</sup> Université de Lorraine, Institut Jean Lamour, UMR CNRS 7198, Groupe Chimie et Electrochimie des Matériaux, 1 boulevard Arago, 57078 Metz Cedex 3, France.

<sup>d</sup> Université de Savoie Mont Blanc, Laboratoire de Chimie Moléculaire et Environnement, Campus Scientifique Savoie Technolac, 73376 Le Bourget du Lac Cedex, France.

**Fig. SI-1** Extraction kinetic of Ln.  $[\text{HNO}_3] = 6 \text{ M}$

**Fig. SI-2** Effect of temperature on the extraction in [EBPip][NTf<sub>2</sub>]. Initial aqueous phase:  $[\text{HNO}_3] 6 \text{ M}$ .

$\text{Ln } D_{\text{Ln}} = f(1/\text{RT} \times 10^3)$  : Nd ( $y = 12.22x + 1.22$ ); Eu ( $y = 11.67x + 0.73$ ); La ( $12.65x + 1.04$ ); Yb ( $y = -9.42x + 0.79$ )

**Fig. SI-3** Nitric acid extraction following the solvent used: a) after pre-equilibrium step and b) after metal extraction

**Fig. SI-4** Theoretical (dot line) and experimental extraction in IL of La vs number of ligands

**Fig. SI-5** a) variation of the ligand concentration vs Eu extracted in organic phase [TPO]-(IL) =  $f([\text{Eu}]_{\text{org}})$ :  $y = 2.94 + 0.3$ ,  $R^2 = 0.998$ ; [TPO]-(Bn<sub>2</sub>O) =  $f([\text{Eu}]_{\text{org}})$ :  $y = 8.58x + 4.3$ ,  $R^2 = 0.997$ ; b) Theoretical (dot line) and experimental extraction in IL of Eu vs number of ligands

**Fig. SI-6** variation of the ligand concentration vs Yb extracted in organic phase. [TPO]-(IL) =  $f([\text{Eu}]_{\text{org}})$ :  $y = 2.86 + 0.15$ ,  $R^2 = 0.982$ ; [TPO]-(Bn<sub>2</sub>O) =  $f([\text{Eu}]_{\text{org}})$ :  $y = 8.8x + 0.38$ ,  $R^2 = 0.996$

**Fig. SI-7** a) Comparison of water extraction with different ILs vs  $[\text{HNO}_3]$ ; b) Extrapolation of the nitric acid extracted in organic phase vs  $[\text{HNO}_3]$

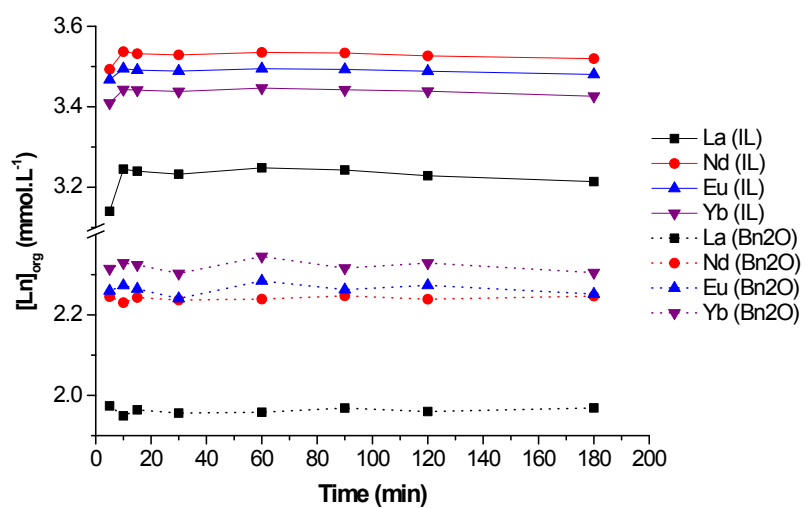

**Fig. SI-1** Extraction kinetic of Ln. [HNO<sub>3</sub>] = 6M

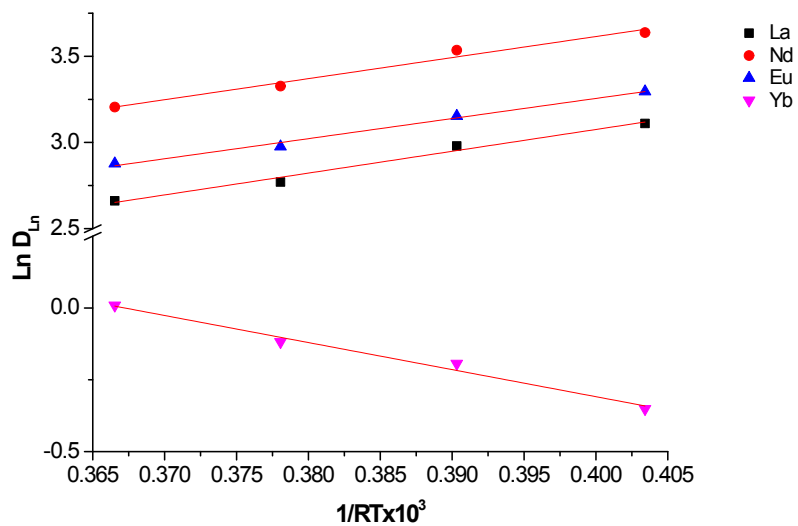

**Fig. SI-2** Effect of temperature on the extraction in [EBPip][NTf<sub>2</sub>]. Initial aqueous phase: [HNO<sub>3</sub>] 6M.

$\text{Ln } D_{\text{Ln}} = f(1/\text{RT} \times 10^3) : \text{Nd } (y = 12.22x + 1.22); \text{Eu } (y = 11.67x + 0.73) ; \text{La } (12.65x + 1.04) ; \text{Yb } (y = -9.42x + 0.79)$

---

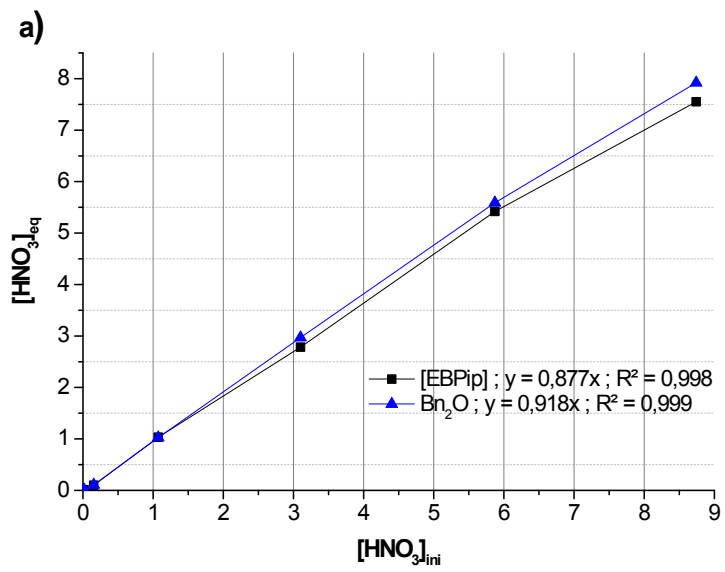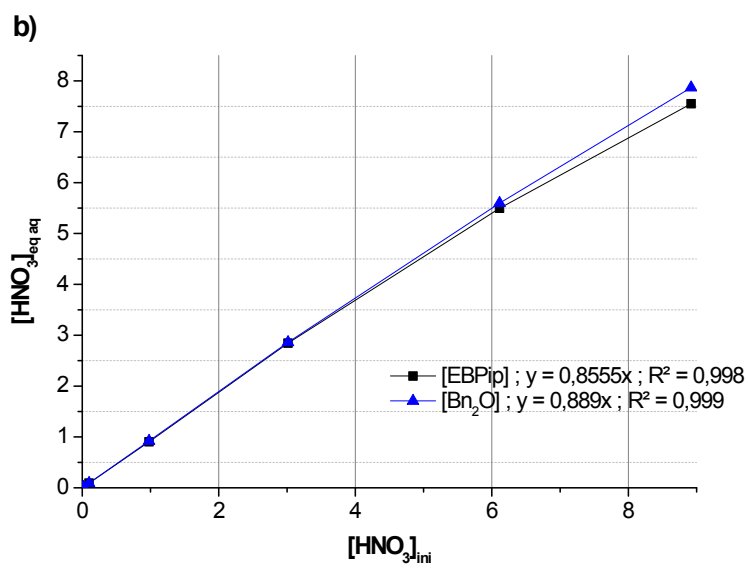

**Fig. SI-3** Nitric acid extraction following the solvent used: a) after pre-equilibrium step and b) after metal extraction

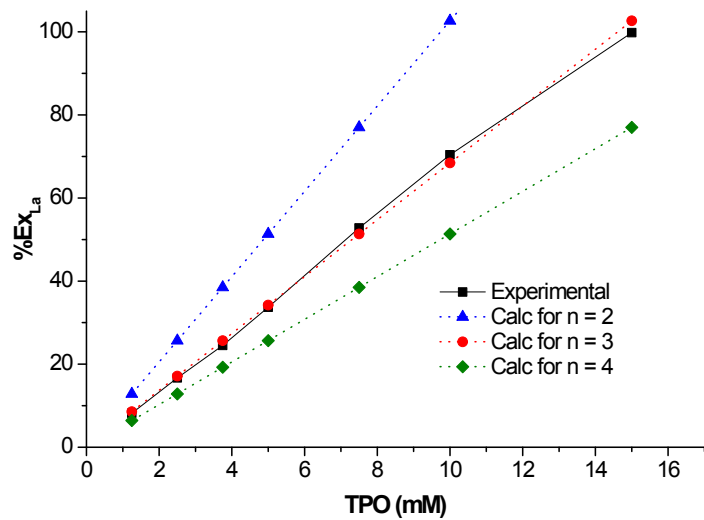

**Fig. SI-4** Theoretical (dot line) and experimental extraction in IL of La vs number of ligands

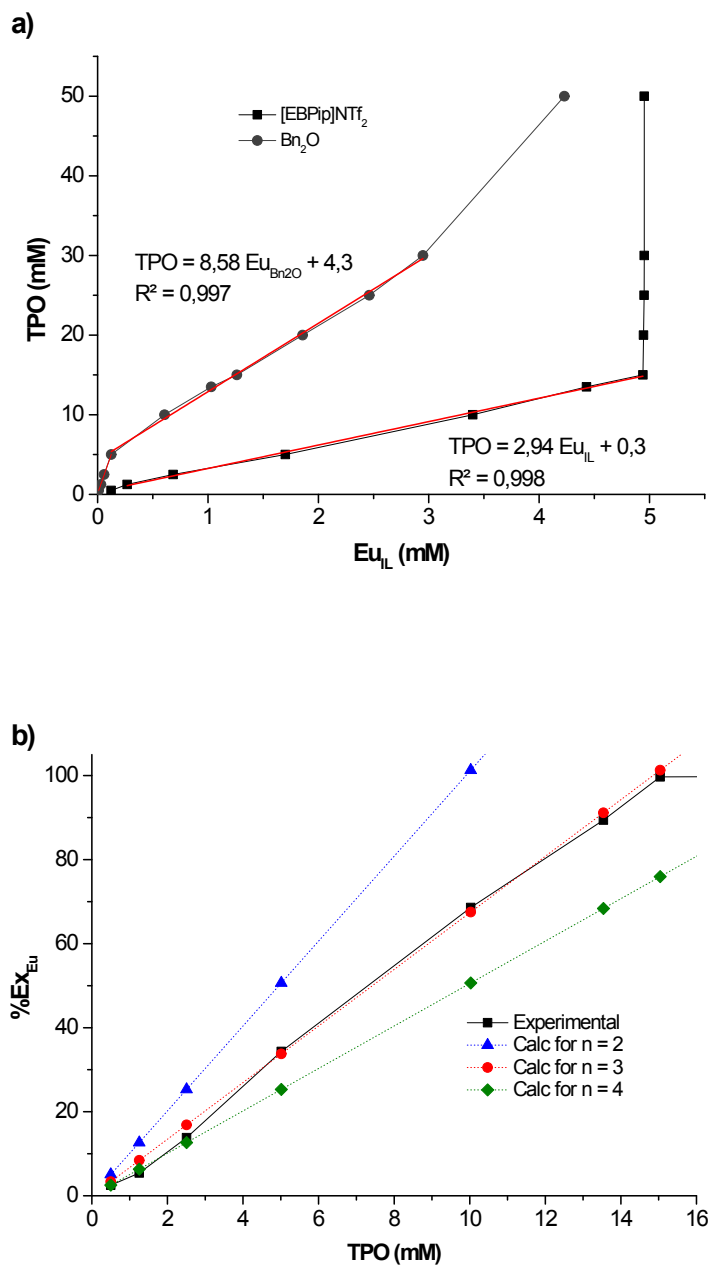

**Fig. SI-5** a) variation of the ligand concentration vs Eu extracted in organic phase  $[TPO]-(IL) = f([Eu]_{org})$ :  $y = 2.94 + 0.3$ ,  $R^2 = 0.998$ ;  $[TPO]-(Bn_2O) = f([Eu]_{org})$ :  $y = 8.58x + 4.3$ ,  $R^2 = 0.997$ ; b) Theoretical (dot line) and experimental extraction in IL of Eu vs number of ligands

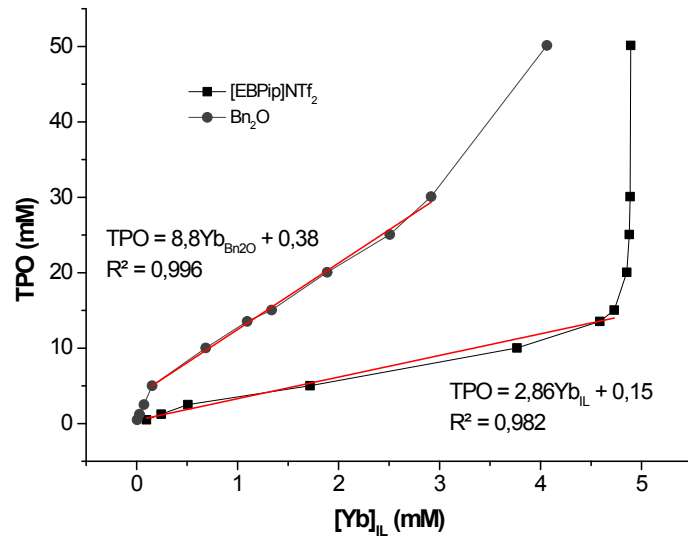

**Fig. SI-6** variation of the ligand concentration vs Yb extracted in organic phase. [TPO]-(IL) = f ([Eu]<sub>org</sub>):  $y = 2.86 + 0.15x$ ,  $R^2 = 0.982$ ; [TPO]-(Bn<sub>2</sub>O) = f ([Eu]<sub>org</sub>):  $y = 8.8x + 0.38$ ,  $R^2 = 0.996$ .

---

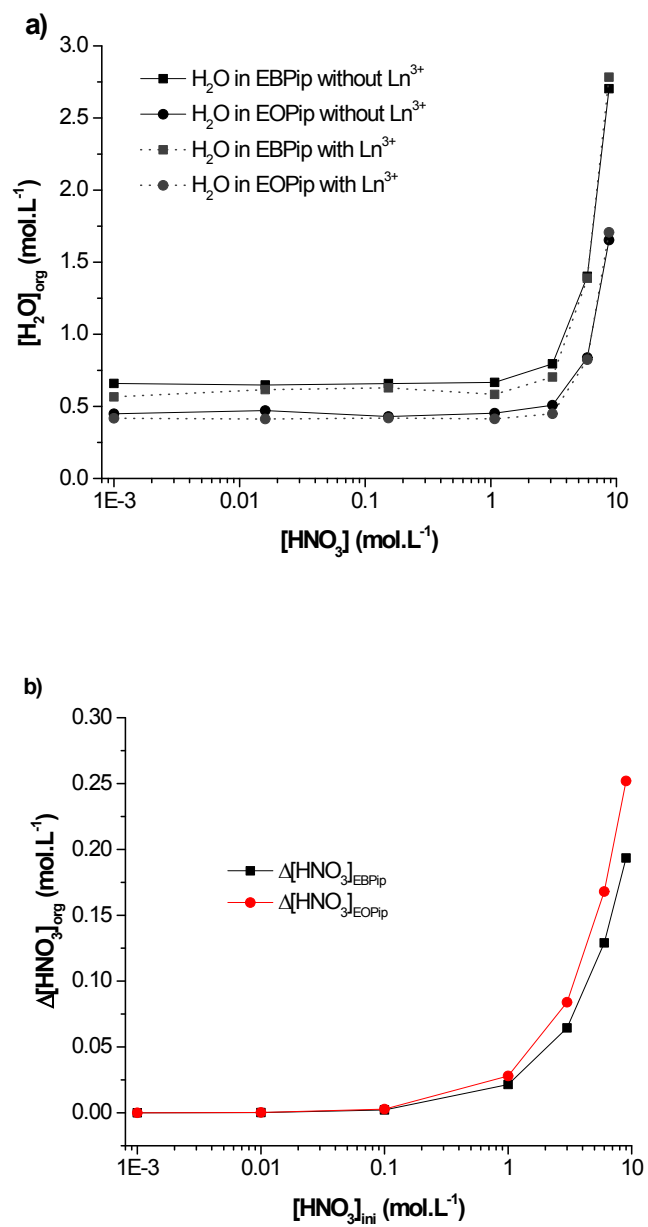

**Fig. SI-7** a) Comparison of water extraction with different ILs vs  $[\text{HNO}_3]$ ; b) Extrapolation of the nitric acid extracted in organic phase vs  $[\text{HNO}_3]$
